# Supplementary material for: Hollow Microneedles on a Paper Fabricated by Standard Photolithography for the Screening Test of Prediabetes
Source: MDPI journal article supplement (doi:10.3390/s22114253), 2022-06-02
Supplement: s1 [file s1]

## Supplementary Information

# Hollow Microneedles on a Paper Fabricated by Standard Photolithography for the Screening Test of Prediabetes

Tianwei Wu <sup>1</sup>, Xueqiu You <sup>1,2,\*</sup> and Zhong Chen <sup>1,\*</sup>

<sup>1</sup> Department of Electronic Science, Fujian Provincial Key Laboratory of Plasma and Magnetic Resonance, State Key Laboratory of Physical Chemistry of Solid Surfaces, Xiamen University, Xiamen 361005, China; 34320191150168@stu.xmu.edu.cn

<sup>2</sup> School of Information Engineering, Jimei University, Xiamen 361021, China

\* Correspondence: youxueqiuqq@126.com (X.Y.); chenz@xmu.edu.cn (Z.C.)

As shown in Figure S1(a-c), when the offset distance ranges from 0  $\mu\text{m}$  to 30  $\mu\text{m}$ , the opening profile also increases. The microneedle heights for different UV intensity is shown in Figure S1(d).

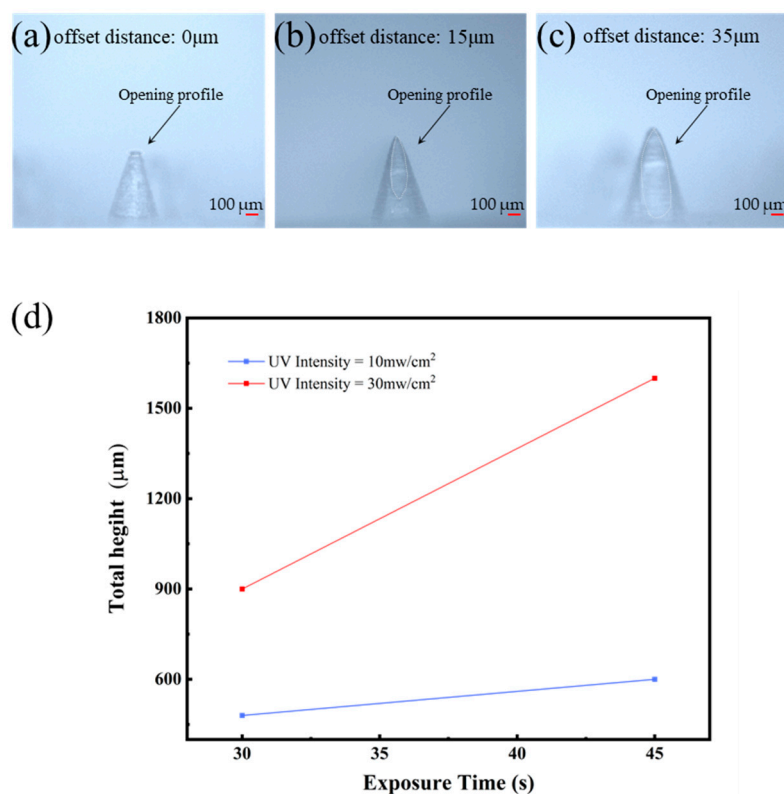

**Figure S1.** (a-c) Optical images of different offset distances. (d) The microneedle heights for different UV intensity.

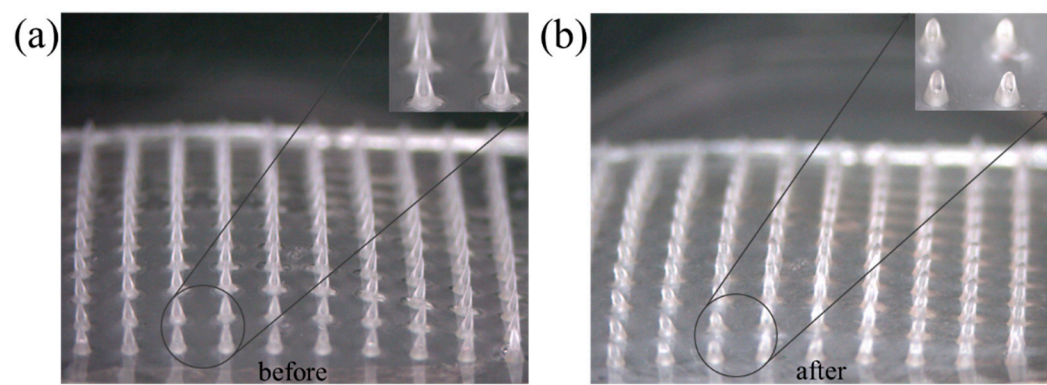

**Figure S2.** The optical image before (a) and after (b) the penetration.
